# Supplementary material for: Drinking water chlorination impact on fecal carriage of extended-spectrum beta-lactamase-producing Enterobacteriaceae in Bangladeshi children in a double-blind, cluster-randomized controlled trial
Source: bioRxiv or medRxiv preprint supplement (doi:10.1101/2022.04.04.22273386), 2022-04-08
Supplement: Supplementary file [file media-1.pdf]

**Table 1: CONSORT 2010 checklist of information to include when reporting a cluster randomised trial**

| Section/Topic                    | Item No | Standard Checklist item                                                                                                                                | Extension for cluster designs                                                                 | Page No/ Section *                                                                                                                                                                   |
|----------------------------------|---------|--------------------------------------------------------------------------------------------------------------------------------------------------------|-----------------------------------------------------------------------------------------------|--------------------------------------------------------------------------------------------------------------------------------------------------------------------------------------|
| <b>Title and abstract</b>        |         |                                                                                                                                                        |                                                                                               |                                                                                                                                                                                      |
|                                  | 1a      | Identification as a randomised trial in the title                                                                                                      | Identification as a cluster randomised trial in the title                                     | Title (Montealegre, Maria C., et al. (2021)) ; Title (Pickering, Amy J., et al. (2019))                                                                                              |
|                                  | 1b      | Structured summary of trial design, methods, results, and conclusions (for specific guidance see CONSORT for abstracts) <sup>[i]</sup> <sup>[ii]</sup> | See table 2                                                                                   | Abstract (Montealegre, Maria C., et al. (2021))<br>Abstract (Pickering, Amy J., et al. (2019))                                                                                       |
| <b>Introduction</b>              |         |                                                                                                                                                        |                                                                                               |                                                                                                                                                                                      |
| <b>Background and objectives</b> | 2a      | Scientific background and explanation of rationale                                                                                                     | Rationale for using a cluster design                                                          | Methods, Participants (Pickering, Amy J., et al. (2019))<br>Not updated for this study (Montealegre et al.) as cluster design was performed in the scope of Pickering, et al. (2019) |
|                                  | 2b      | Specific objectives or hypotheses                                                                                                                      | Whether objectives pertain to the the cluster level, the individual participant level or both | Methods, Study design and fecal samples (Montealegre, Maria C., et al. (2021)),<br>Introduction (Pickering, Amy J., et al. (2019))                                                   |
| <b>Methods</b>                   |         |                                                                                                                                                        |                                                                                               |                                                                                                                                                                                      |
| <b>Trial design</b>              | 3a      | Description of trial design (such as parallel, factorial) including allocation ratio                                                                   | Definition of cluster and description of how the design features apply to the clusters        | Methods, Study design and fecal samples (Montealegre, Maria C., et al. (2021)),<br>Methods, Participants (Pickering, Amy J., et al. (2019))                                          |
|                                  | 3b      | Important changes to methods after trial commencement (such as eligibility criteria), with reasons                                                     |                                                                                               | <b>N/A</b>                                                                                                                                                                           |
| <b>Participants</b>              | 4a      | Eligibility criteria for participants                                                                                                                  | Eligibility criteria for clusters                                                             | Methods, Study design and fecal samples (Montealegre, Maria C., et al. (2021));<br>Methods, Participants (Pickering, Amy J., et al. (2019))                                          |
|                                  | 4b      | Settings and locations where the data were collected                                                                                                   |                                                                                               | Methods, Study design and fecal samples (Montealegre, Maria C., et al. (2021));<br>Methods, Study design (Pickering, Amy J., et al. (2019))                                          |
|                                  |         | The interventions for each group with sufficient details to                                                                                            | Whether interventions pertain to the                                                          | Methods, Study design and fecal samples (Montealegre, Maria C., et al. (2021));                                                                                                      |

|                                         |    |                                                                                                                                                                                             |                                                                                                                                                                                                                    |                                                                                                                                                                                          |
|-----------------------------------------|----|---------------------------------------------------------------------------------------------------------------------------------------------------------------------------------------------|--------------------------------------------------------------------------------------------------------------------------------------------------------------------------------------------------------------------|------------------------------------------------------------------------------------------------------------------------------------------------------------------------------------------|
| <b>Interventions</b>                    | 5  | allow replication, including how and when they were actually administered                                                                                                                   | cluster level, the individual participant level or both                                                                                                                                                            | Methods, Intervention delivery (Pickering, Amy J., et al. (2019))                                                                                                                        |
| <b>Outcomes</b>                         | 6a | Completely defined pre-specified primary and secondary outcome measures, including how and when they were assessed                                                                          | Whether outcome measures pertain to the cluster level, the individual participant level or both                                                                                                                    | Methods, Study design and fecal samples (Montealegre, Maria C., et al. (2021));<br>Methods - outcomes (Pickering, Amy J., et al. (2019))                                                 |
|                                         | 6b | Any changes to trial outcomes after the trial commenced, with reasons                                                                                                                       |                                                                                                                                                                                                                    | Methods - outcomes (Pickering, Amy J., et al. (2019))<br>Not updated for this study (Montealegre et al.) as any changes were reported in Pickering et al. (2019)                         |
| <b>Sample size</b>                      | 7a | How sample size was determined                                                                                                                                                              | Method of calculation, number of clusters(s) (and whether equal or unequal cluster sizes are assumed), cluster size, a coefficient of intracluster correlation (ICC or $k$ ), and an indication of its uncertainty | Methods, Study design and fecal samples (Montealegre, Maria C., et al. (2021));<br>Methods – statistical analysis (Pickering, Amy J., et al. (2019))                                     |
|                                         | 7b | When applicable, explanation of any interim analyses and stopping guidelines                                                                                                                |                                                                                                                                                                                                                    | Procedures (Pickering, Amy J., et al. (2019))<br>Not updated for this study (Montealegre et al.)                                                                                         |
| <b>Randomisation:</b>                   |    |                                                                                                                                                                                             |                                                                                                                                                                                                                    |                                                                                                                                                                                          |
| <b>Sequence generation</b>              | 8a | Method used to generate the random allocation sequence                                                                                                                                      |                                                                                                                                                                                                                    | Methods, Randomisation (Pickering, Amy J., et al. (2019))<br>Not updated for this study (Montealegre et al.) as random allocation was performed in the scope of Pickering, et al. (2019) |
|                                         | 8b | Type of randomisation; details of any restriction (such as blocking and block size)                                                                                                         | Details of stratification or matching if used                                                                                                                                                                      | Methods, Randomisation (Pickering, Amy J., et al. (2019))<br>Not updated for this study (Montealegre et al.) as randomisation was performed in the scope of Pickering, et al. (2019)     |
| <b>Allocation concealment mechanism</b> | 9  | Mechanism used to implement the random allocation sequence (such as sequentially numbered containers), describing any steps taken to conceal the sequence until interventions were assigned | Specification that allocation was based on clusters rather than individuals and whether allocation concealment (if any) was at the cluster level, the individual participant level or both                         | Methods, Randomisation (Pickering, Amy J., et al. (2019))<br>Not updated for this study (Montealegre et al.) as random allocation was performed in the scope of Pickering, et al. (2019) |

|                            |     |                                                                                                                                          |                                                                                                                                                                     |                                                                                                                                                                                                          |
|----------------------------|-----|------------------------------------------------------------------------------------------------------------------------------------------|---------------------------------------------------------------------------------------------------------------------------------------------------------------------|----------------------------------------------------------------------------------------------------------------------------------------------------------------------------------------------------------|
| <b>Implementation</b>      | 10  | Who generated the random allocation sequence, who enrolled participants, and who assigned participants to interventions                  | Replace by 10a, 10b and 10c                                                                                                                                         | Methods, Randomisation (Pickering, Amy J., et al. (2019))<br>Not updated for this study (Monteleagre et al.) as random allocation was performed in the scope of Pickering, et al. (2019)                 |
|                            | 10a |                                                                                                                                          | Who generated the random allocation sequence, who enrolled clusters, and who assigned clusters to interventions                                                     | Methods, Randomisation (Pickering, Amy J., et al. (2019))<br>Not updated for this study (Monteleagre et al.) as random allocation was performed in the scope of Pickering, et al. (2019)                 |
|                            | 10b |                                                                                                                                          | Mechanism by which individual participants were included in clusters for the purposes of the trial (such as complete enumeration, random sampling)                  | Methods, Randomisation (Pickering, Amy J., et al. (2019))<br>Not updated for this study (Monteleagre et al.) as random allocation and enrollment were performed in the scope of Pickering, et al. (2019) |
|                            | 10c |                                                                                                                                          | From whom consent was sought (representatives of the cluster, or individual cluster members, or both), and whether consent was sought before or after randomisation | Methods, Study design (Pickering, Amy J., et al. (2019))<br>Not updated for this study (Monteleagre et al.) as consent was sought in the scope of Pickering, et al. (2019)                               |
| <b>Blinding</b>            | 11a | If done, who was blinded after assignment to interventions (for example, participants, care providers, those assessing outcomes) and how |                                                                                                                                                                     | Methods, Study design and fecal samples (Monteleagre, Maria C., et al. (2021));<br>Methods, intervention delivery and masking (Pickering, Amy J., et al. (2019))                                         |
|                            | 11b | If relevant, description of the similarity of interventions                                                                              |                                                                                                                                                                     | Methods, intervention delivery and masking (Pickering, Amy J., et al. (2019))<br>Not updated for this study (Monteleagre et al.)                                                                         |
| <b>Statistical methods</b> | 12a | Statistical methods used to compare groups for primary and secondary outcomes                                                            | How clustering was taken into account                                                                                                                               | Methods, Statistical analyses (Monteleagre, Maria C., et al. (2021));<br>Methods – statistical analysis (Pickering, Amy J., et al. (2019))                                                               |
|                            |     | Methods for additional analyses, such as subgroup analyses                                                                               |                                                                                                                                                                     | Methods, Statistical analyses (Monteleagre, Maria C., et al. (2021));                                                                                                                                    |

|                                                             |     |                                                                                                                                                   |                                                                                                                                             |                                                                                                                                                                        |
|-------------------------------------------------------------|-----|---------------------------------------------------------------------------------------------------------------------------------------------------|---------------------------------------------------------------------------------------------------------------------------------------------|------------------------------------------------------------------------------------------------------------------------------------------------------------------------|
|                                                             | 12b | and adjusted analyses                                                                                                                             |                                                                                                                                             | Methods – statistical analysis (Pickering, Amy J., et al. (2019))                                                                                                      |
| <b>Results</b>                                              |     |                                                                                                                                                   |                                                                                                                                             |                                                                                                                                                                        |
| <b>Participant flow (a diagram is strongly recommended)</b> | 13a | For each group, the numbers of participants who were randomly assigned, received intended treatment, and were analysed for the primary outcome    | For each group, the numbers of clusters that were randomly assigned, received intended treatment, and were analysed for the primary outcome | Methods and Results (Montealegre, Maria C., et al. (2021));<br>Figure 1 (Pickering, Amy J., et al. (2019))                                                             |
|                                                             | 13b | For each group, losses and exclusions after randomisation, together with reasons                                                                  | For each group, losses and exclusions for both clusters and individual cluster members                                                      | Methods, Study design and fecal samples (Montealegre, Maria C., et al. (2021));<br>Figure 1 (Pickering, Amy J., et al. (2019))                                         |
| <b>Recruitment</b>                                          | 14a | Dates defining the periods of recruitment and follow-up                                                                                           |                                                                                                                                             | Results (Pickering, Amy J., et al. (2019))<br>Not updated for this study (Montealegre et al.), as recruitment and follow-up were conducted in Pickering et al. (2019). |
|                                                             | 14b | Why the trial ended or was stopped                                                                                                                |                                                                                                                                             | Results and Discussion (Pickering, Amy J., et al. (2019))<br>Not updated for this study (Montealegre et al.), as trial was ended in scope of Pickering et al. (2019).  |
| <b>Baseline data</b>                                        | 15  | A table showing baseline demographic and clinical characteristics for each group                                                                  | Baseline characteristics for the individual and cluster levels as applicable for each group                                                 | Table 1 (Montealegre, Maria C., et al. (2021));<br>Table 1 (Pickering, Amy J., et al. (2019))                                                                          |
| <b>Numbers analysed</b>                                     | 16  | For each group, number of participants (denominator) included in each analysis and whether the analysis was by original assigned groups           | For each group, number of clusters included in each analysis                                                                                | Results (Montealegre, Maria C., et al. (2021));<br>Figure 1 (Pickering, Amy J., et al. (2019))                                                                         |
| <b>Outcomes and estimation</b>                              | 17a | For each primary and secondary outcome, results for each group, and the estimated effect size and its precision (such as 95% confidence interval) | Results at the individual or cluster level as applicable and a coefficient of intracluster correlation (ICC or k) for each primary outcome  | Results (Montealegre, Maria C., et al. (2021));<br>Figure 1, Table 3 (Pickering, Amy J., et al. (2019))                                                                |
|                                                             | 17b | For binary outcomes, presentation of both absolute and relative effect sizes is recommended                                                       |                                                                                                                                             | Results (Montealegre, Maria C., et al. (2021));<br>Table 3 (Pickering, Amy J., et al. (2019))                                                                          |
| <b>Ancillary analyses</b>                                   | 18  | Results of any other analyses performed, including subgroup analyses and adjusted analyses, distinguishing pre-specified from exploratory         |                                                                                                                                             | Results (Montealegre, Maria C., et al. (2021));<br>Results, Table 2, Table 3 (Pickering, Amy J., et al. (2019))                                                        |
| <b>Harms</b>                                                | 19  | All important harms or unintended effects in each group (for specific guidance see CONSORT for harms[iii])                                        |                                                                                                                                             | Results (Pickering, Amy J., et al. (2019))<br>Not updated for this study, as focused on secondary sample analysis (Montealegre et al.)                                 |

| Discussion              |    |                                                                                                                  |                                                                                                                                                                                 |
|-------------------------|----|------------------------------------------------------------------------------------------------------------------|---------------------------------------------------------------------------------------------------------------------------------------------------------------------------------|
| <b>Limitations</b>      | 20 | Trial limitations, addressing sources of potential bias, imprecision, and, if relevant, multiplicity of analyses | Discussion (Montealegre, Maria C., et al. (2021))<br>Discussion (Pickering, Amy J., et al. (2019))                                                                              |
| <b>Generalisability</b> | 21 | Generalisability (external validity, applicability) of the trial findings                                        | Generalisability to clusters and/or individual participants (as relevant)<br>Discussion (Montealegre, Maria C., et al. (2021))<br>Discussion (Pickering, Amy J., et al. (2019)) |
| <b>Interpretation</b>   | 22 | Interpretation consistent with results, balancing benefits and harms, and considering other relevant evidence    | Discussion (Montealegre, Maria C., et al. (2021))<br>Discussion (Pickering, Amy J., et al. (2019))                                                                              |
| Other information       |    |                                                                                                                  |                                                                                                                                                                                 |
| <b>Registration</b>     | 23 | Registration number and name of trial registry                                                                   | Methods (Pickering, Amy J., et al. (2019))<br>Not updated for this study (Montealegre et al.)                                                                                   |
| <b>Protocol</b>         | 24 | Where the full trial protocol can be accessed, if available                                                      | Published on Open Science Framework, link in Methods (Pickering, Amy J., et al. (2019))<br>Not updated for this study (Montealegre et al.)                                      |
| <b>Funding</b>          | 25 | Sources of funding and other support (such as supply of drugs), role of funders                                  | Summary, Funding (Montealegre, Maria C., et al. (2021))<br>Abstract, Role of Funder section (Pickering, Amy J., et al. (2019))                                                  |

[1] Relevant to Conference Abstracts

#### REFERENCES

- [i] Hopewell S, Clarke M, Moher D, Wager E, Middleton P, Altman DG, et al. CONSORT for reporting randomised trials in journal and conference abstracts. *Lancet* 2008, 371:281-283
- [ii] Hopewell S, Clarke M, Moher D, Wager E, Middleton P, Altman DG at al (2008) CONSORT for reporting randomized controlled trials in journal and conference abstracts: explanation and elaboration. *PLoS Med* 5(1): e20
- [iii] Ioannidis JP, Evans SJ, Gotzsche PC, O'Neill RT, Altman DG, Schulz K, Moher D. Better reporting of harms in randomized trials: an extension of the CONSORT statement. *Ann Intern Med* 2004; 141(10):781-788.
